# Supplementary material for: One-step synthesis of highly aligned SnO2 nanorods on a self-produced Na2Sn(OH)6 substrate for high-performance lithium-ion batteries
Source: Royal Society of Chemistry journal article supplement (doi:10.1039/c4ce02319f), 2015-01-01
Supplement: c4ce02319f1.pdf [file c4ce02319f1.pdf]

## Supplementary Information

### One-step synthesis of highly aligned SnO<sub>2</sub> nanorods on self-produced Na<sub>2</sub>Sn(OH)<sub>6</sub> substrate for performance lithium-ion batteries

Xiguang Han,<sup>\*ab</sup> Xiao Han,<sup>a</sup> Linqiang Sun,<sup>a</sup> Qianqian Liu,<sup>a</sup> Wei Xu,<sup>a</sup> Liang Li,<sup>a</sup> Po Wang,<sup>a</sup> Chao Wang<sup>a</sup>

<sup>a</sup>*Department of Chemistry, School of Chemistry and Chemical Engineering, Xuzhou Normal University, Xuzhou, Jiangsu 221116, China.*

<sup>b</sup>*Jiangsu Key Laboratory of Green Synthetic Chemistry for Functional Materials, Xuzhou Normal University, Xuzhou, 221116, P. R. China*

*E-mail: xghan@jsnu.edu.cn*

#### Experimental Section:

##### Synthesis and characterization of SnO<sub>2</sub>/ Na<sub>2</sub>Sn(OH)<sub>6</sub> array:

In a typical synthesis, SnCl<sub>4</sub>•5H<sub>2</sub>O (0.35 g, 1 mmol), PVP (K-30, M=58000, 0.335 g, 0.006 mmol) and NaOH (0.28 g, 7 mmol) were in order added to the mixed solvent of ethanol and distilled water (6 mL, v/v of 1:1). The mixed solvent placed in a beaker was put into ultrasonic cleaning machine (Frequency: 40 KHZ, Power: 50 W) for about 5 minutes. The purpose of treatment is fully mixed of the reactants. The resulting solution was transferred into a Teflon-lined stainless-steel autoclave and was kept at 200 °C for 18 h. The products were collected by centrifugation at 10000 rpm, and washed several times with deionized water and ethanol.

The composition and phase of the as-prepared products were acquired by the powder X-ray diffraction (XRD) pattern using a Panalytical X-pert diffractometer with CuK $\alpha$  radiation. The morphology and crystal structure of as-prepared products were observed by scanning electron microscopy (SEM, S4800), and high-resolution transmission electron microscopy (HRTEM, FEI Tecnai-F30) with an acceleration voltage of 300 kV. All TEM samples were prepared from depositing a drop of diluted suspensions in ethanol on a carbon film coated copper grid.

**Measurement of lithium-ion batteries.** The working electrode was prepared by compressing a mixture of active materials, acetylene black, and binder (poly(tetrafluoroethylene, PTFE) in a weight ratio of 75:15:10. The weight of working

electrode is around 1.5 mg/cm<sup>2</sup>. Lithium metal was used as the counter and reference electrodes. The electrolyte was LiPF<sub>6</sub> (1 M) dissolved in a mixture of ethylene carbonate (EC), ethyl methyl carbonate (EMC) and dimethyl carbonate (DMC) with a volume ratio of 1:1:1. The galvanostatic method at the charge/discharge current density of 100 mA g<sup>-1</sup> was employed to measure the electrochemical capacity and cycle life of the working electrode using a LAND-CT2001A instrument. The cut-off potentials for charge and discharge were set at 2.5 and 0.1 V (vs. Li<sup>+</sup>/Li), respectively. All electrochemical measurements were carried out at room temperature.
